# Supplementary material for: Antenna functions of 5,15-bis(imidazol-4-yl)-10,20-bis(4-dodecyloxyphenyl)-porphyrin supramolecular assembly through imidazole–imidazole hydrogen bonding
Source: Royal Society of Chemistry journal article supplement (doi:10.1039/b003267k), 2000-01-01

**Antenna functions of 5,15-bis(4-imidazolyl)-10,20-bis(4-dodecyloxyphenyl) porphyrin supramolecular assembly through imidazole-imidazole hydrogen bondings**

N. Nagata, S. Kugimiya, and Y. Kobuke*

**Supplementary Material**

**Experimental Section**

**General procedure.** 1H NMR spectra were recorded on either a JEOL JNM EX-270 or JEOL Lambda 400. MALDI-TOF mass spectra were obtained with Perseptive Biosystems Voyager DE-STR with dithranol (Aldrich) as a matrix. UV-vis spectra were obtained with a Shimadzu UV-3100PC spectrometer. Fluorescence spectra were measured by a Hitachi F-4500 spectrometer. 1H-NMR titrations were carried out with **1** (4 mmole dm-3) dissolved in CDCl3 (0.5 mL) by the addition of CD3OD at 20°C. C-H COSY spectra were measured with a mixed solvent of CDCl3 (0.5 mL) and CD3OD (0.16 mL). Stern-Volmer quenching studies were performed at [**1**] = [**3**] = 1.6 mole dm-3. Static light scattering measurement employed Otsuka Electronics DLS-7000 by using a He-Ne laser at 632 nm.

**4(5)-imidazolyl-2,2'-dipyrrylmethane**.

A solution of imidazole-4(5)-carboxaldehyde (450mg, 4.69mmol) dissolved in 12.6g (188 mmol) of pyrrole was purged with Ar gas for 10 min. To this solution, 700 L (9.20 mmol) of trifluoroacetic acid (TFA) was added in ten portions. The reaction flask was protected from light and the solution was stirred for 6 hr at room temperature. The pyrrole solution was diluted with 200 mL of CHCl3 and washed with 50 mL of saturated sodium bicarbonate and 50 mL of distilled water. Chloroform and excess pyrrole was removed under reduced pressure. The residue was applied to a silica gel column (2 x 20 cm, CHCl3/MeOH = 5/1) to yield pale yellow solid, 395 mg, 39.7 %. 1H NMR (270MHz, CDCl3 0.35ml)  = 8.74 (2H, br, pyrrole NH), 7.36 (1H, s, imidazole), 6.68 (1H, s, imidazole), 6.62 (2H, s, pyrrole H), 6.11 (2H, t, *J* = 3.6 Hz, pyrrole H), 5.94 (2H, s, pyrrole H), 5.40 (1H, s, meso-H).

**5,15-bis(4(5)-imidazolyl)-10,20-bis(4-dodecyloxyphenyl) porphyrin 1**.

A solution of 4(5)-imidazolyl-2,2'-dipyrrylmethane (395mg, 1.86mmol) and 4-dodecyloxybenzaldehyde (540mg, 1.86mmol) in 200 mL of CHCl3 was purged with Ar gas for 10 min. To this solution, 280 L (3.72 mmol) of TFA was added in 20 portions. The reaction flask was portected from light and the reaction mixture was allowed to stir for 20 hr at room temperature. 2,3-Dichloro-5,6-dicyano-p-benzoquinone (DDQ, 845mg, 3.72 mmol) was added and the solution was kept stirring for 1 hr. Most of CHCl3 was evaporated and the residue was washed with 300 mL of saturated sodium bicarbonate and 300 mL of distilled water. The product was purified by silica gel (CHCl3: CH3OH 10:1 v/v) and alumina column (activity IV; CHCl3: CH3OH 30:1 v/v) chromatographies successively to give violet crystals (56.7mg, 0.059 mmol, yield 3.16%). 1H NMR (400MHz, CDCl3 0.35ml, TFA 40l, 20°C)  = 9.57 (2H, s, imidazole), 8.92 (2H, s, imidazole), 8.86 (4H, d, *J* = 8.0 Hz, pyrroleH), 8.71 (4H, d, *J* = 8.0 Hz, pyrroleH), 8.38 (4H, d, *J* = 8.0 Hz, phenoxy), 7.60 (4H, d, *J* = 8.0 Hz, phenoxy), 4.37(4H, t, *J* = 8.0 Hz, OCH2), 2.04 (2H, m, -CH2-), 1.65 - 1.16 (36H, s, -(CH2)9-), 0.88 (6H, t, *J* = 8.0 Hz, -CH3), -0.84 (2H, s, pyrroleNH) . UV-Vis (CHCl3) max(nm) 424, 521, 561, 592, 655 . MALDI-TOF mass (dithranol) m/z = 963.40 (calc. M+: 963.30 for C62H74N8O2)+. Anal. Calcd for (C62H74N8O2 + 0.5H2O): C, 76.59; H, 7.78; N, 11.52. Found: C, 76.56; H, 7.67; N, 11.41.


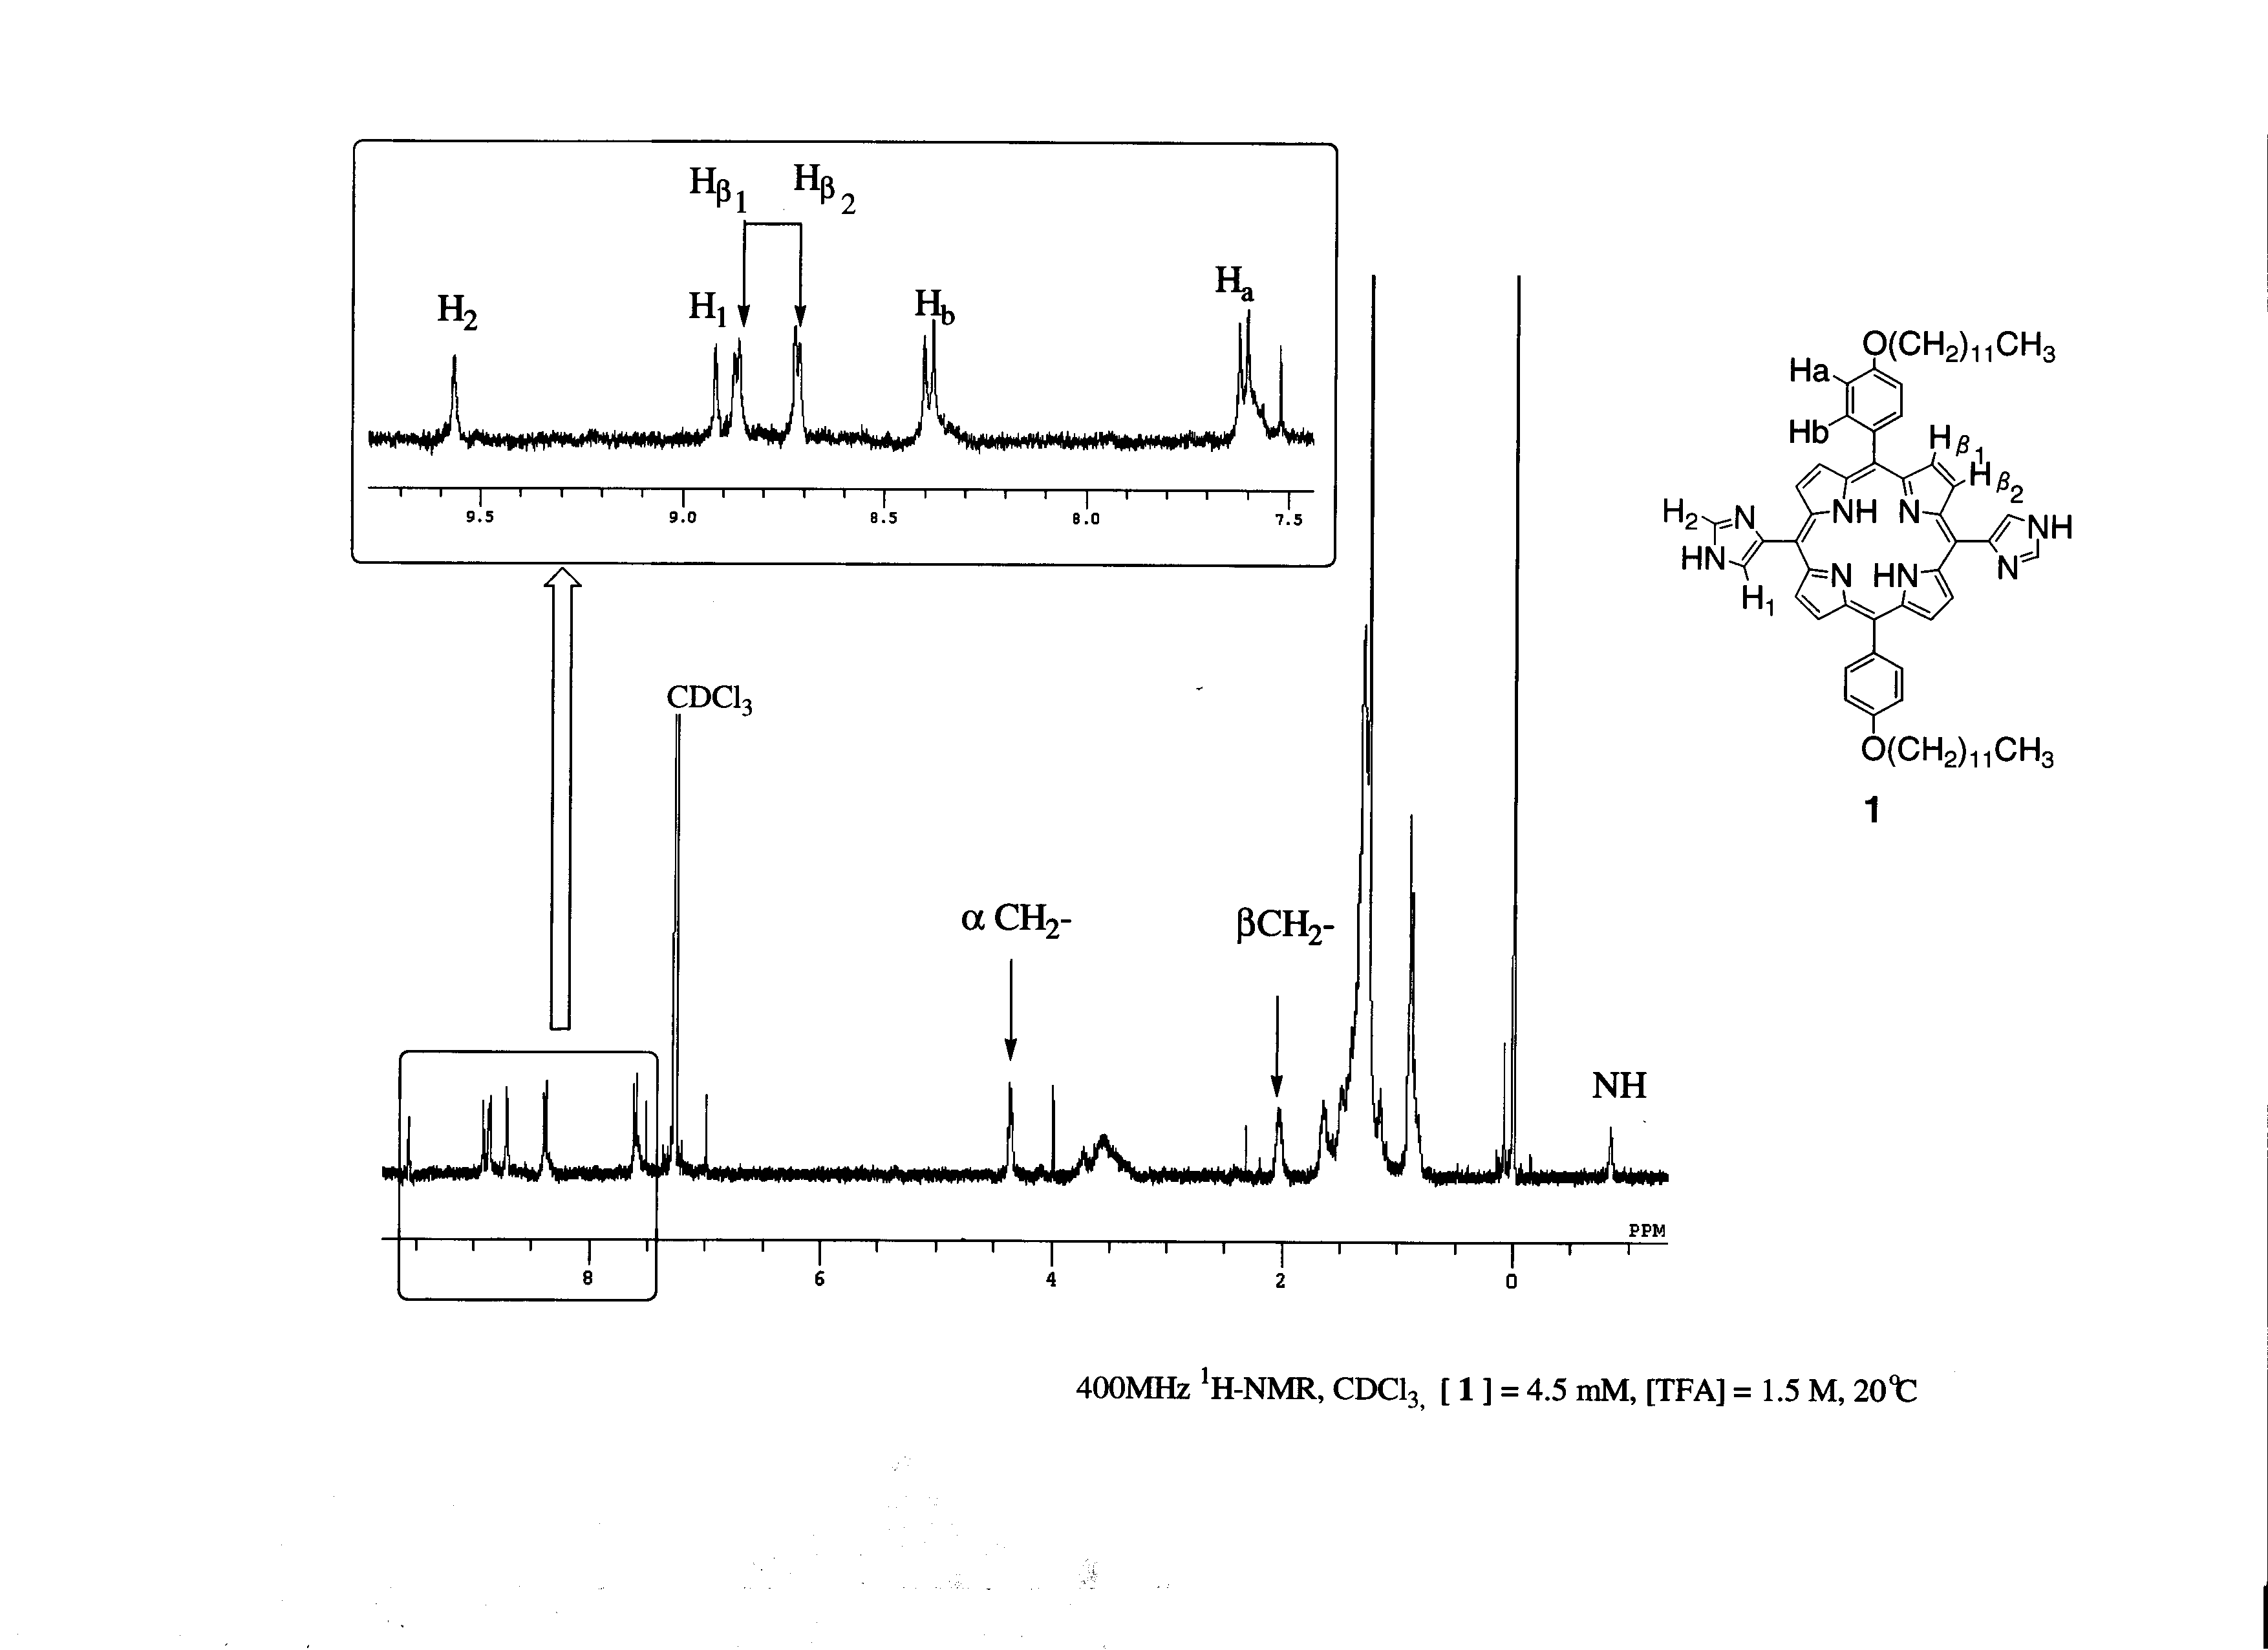

Supplement: b003267k.doc [file b003267k.doc]
